# Supplementary material for: A dual spin-controlled chiral two-/three-dimensional perovskite artificial leaf for efficient overall photoelectrochemical water splitting
Source: PubMed Central journal article supplement (PMC11144254; doi:10.1038/s41467-024-49216-x), 2024-06-01
Supplement: 41467_2024_49216_MOESM3_ESM.pdf [file 41467_2024_49216_MOESM3_ESM.pdf]

## Description of Additional Supplementary files

**Supplementary Movie 1.** Solar water splitting using the co-planar OIHP-based photocathode–photoanode system under outdoor condition.
